# Supplementary material
Source: Springer Nature journal article supplement (https://www.springermedizin.de/resource/supplementary/13063_2010_530_MOESM4_ESM.pdf/9618174)
Supplement: MOESM4 [file 9618174]

|                                | School term | Wave 1                                                         | Wave 2                                                         |
|--------------------------------|-------------|----------------------------------------------------------------|----------------------------------------------------------------|
| <b>2006-2007 Academic year</b> | First       | First follow-up visit (T0)                                     |                                                                |
|                                | Second      | <i>Interventions</i>                                           |                                                                |
|                                | Third       |                                                                |                                                                |
| <b>2007-2008 Academic year</b> | First       | Second follow-up visit (T1)                                    | First follow-up visit (T0)                                     |
|                                | Second      | <i>Interventions</i>                                           | <i>Interventions</i>                                           |
|                                | Third       | (Last follow-up visit (T2) for vocational courses)             |                                                                |
| <b>2008-2009 Academic year</b> | First       | Last follow-up visit (T2) for general or technological courses | Second follow-up visit (T1)                                    |
|                                | Second      |                                                                | <i>Interventions</i>                                           |
|                                | Third       |                                                                | (Last follow-up visit (T2) for vocational courses)             |
| <b>2009-2010 Academic year</b> | First       |                                                                | Last follow-up visit (T2) for general or technological courses |
